# Supplementary material for: Qualitative and Quantitative Analysis of the Major Bioactive Components of Juniperus chinensis L. Using LC-QTOF-MS and LC-MSMS and Investigation of Antibacterial Activity against Pathogenic Bacteria
Source: MDPI journal article supplement (doi:10.3390/molecules28093937), 2023-05-07
Supplement: s1 [file s1]

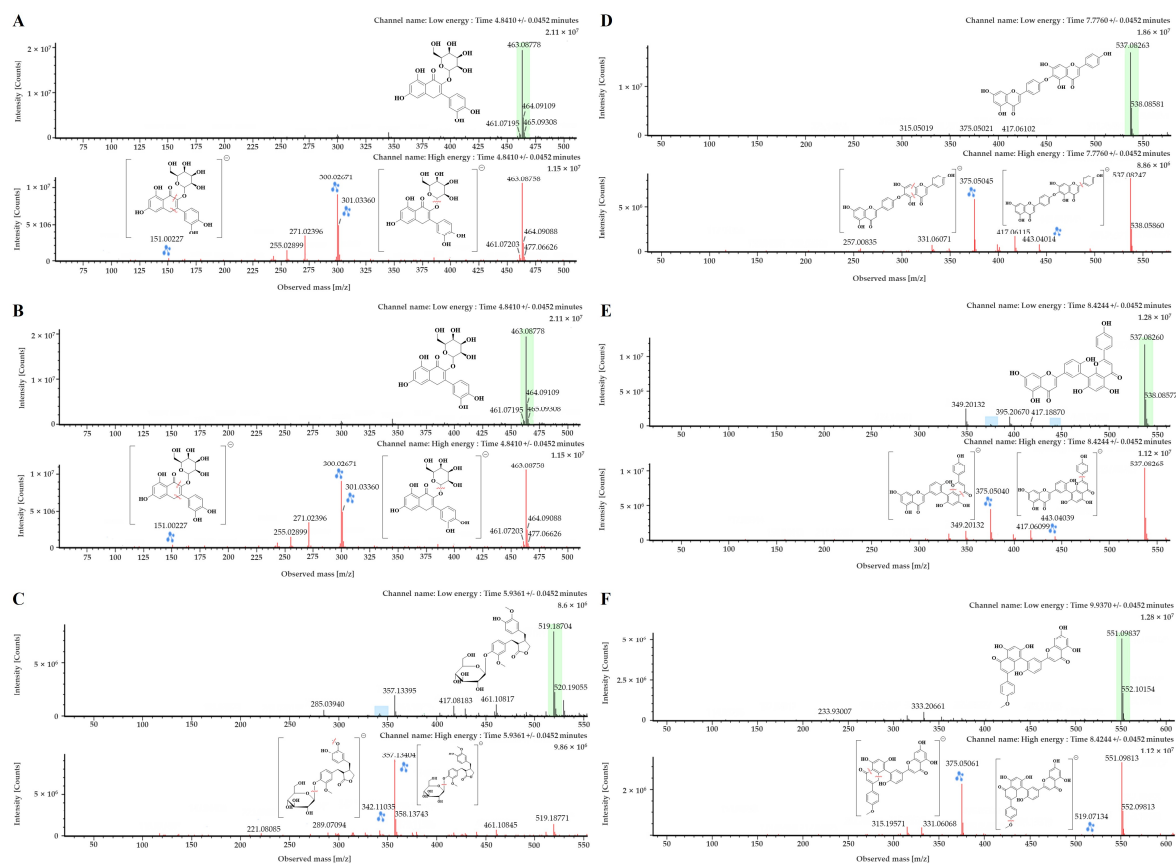

Figure S1: Fragment ion pattern isoquercetin (A), quercetin-3-O- $\alpha$ -L-rhamnoside (B), matairesinoid (C), hinokiflavone (D), amentoflavone (E), and podocarpusflavone A (F) using mass spectra obtained by UPLC-QTOF-MS.
